1                   **Wastewater monitoring of SARS-CoV-2 gene for COVID-19 epidemiological**  
2                   **surveillance in Tucumán Argentina**

3  
4       María Cecilia D'Arpino<sup>a</sup>, Pedro Eugenio Sineli<sup>b</sup>, Gustavo Goroso<sup>c</sup>, William Watanabe<sup>c</sup>, María  
5       Lucila Saavedra<sup>e</sup>, Elvira María Hebert<sup>e</sup>, María Alejandra Martínez<sup>b</sup>, Julieta Migliavaca<sup>f</sup>, Silvina  
6       Gerstenfeld<sup>f</sup>, Rossana Elena Chahla<sup>f</sup>, Augusto Bellomio<sup>d</sup>, Virginia Helena Albarracín<sup>a,§\*</sup>

7  
8       <sup>a</sup>Laboratory of Molecular and Ultrastructural Microbiology, Centro Integral de Microscopía  
9       Electrónica,(CIME-CONICET), Universidad Nacional de Tucumán, Facultad de Agronomía,  
10       Zootecnia y Veterinaria, Tucumán, Argentina.

11       <sup>b</sup>Planta Piloto de Procesos Industriales Microbiológicos (PROIMI-CONICET), Tucumán,  
12       Argentina.

13       <sup>c</sup>Laboratorio de Processamento de Sinais e Modelagem de Sistemas Biológicos. Núcleo de  
14       Pesquisas Tecnológicas. Universidade Mogi das Cruzes, Sao Paulo, Brasil.

15       <sup>d</sup>Instituto Superior de Investigaciones Biológicas (INSIBIO, CONICET-Universidad Nacional  
16       de Tucumán), Tucumán, Argentina.

17       <sup>e</sup>Centro de Referencia para Lactobacilos (CERELA-CONICET), Tucumán, Argentina.

18       <sup>f</sup>Ministerio de Salud, Gobierno de Tucumán (SIPROSA). Tucumán, Argentina.

19       <sup>§</sup> Facultad de Ciencias Naturales e Instituto Miguel Lillo, Universidad Nacional Tucumán.  
20       Tucumán, Argentina.

21  
22       **\*Corresponding author:**

23       Virginia Helena Albarracín

24       Lab of Molecular and Ultrastructural Microbiology

25       Centro Integral de Microscopía Electrónica, CONICET, Universidad Nacional de Tucumán

26       Finca El Manantial, Facultad de Agronomía y zootecnia

27       Camino de Sirga s/n(CP 4107), Tucumán, Argentina.

28       E-mail: [valbarracin@csnat.unt.edu.ar](mailto:valbarracin@csnat.unt.edu.ar)

29  
30       **Abbreviations:** COVID-19, Coronavirus disease-19; Cq, quantification cycle; PEG,  
31       polyethyleneglycol; SARS-CoV-2, acute respiratory syndrome-coronavirus 2; WBE,  
32       wastewater-based epidemiology; WWTP, wastewater treatment plant.

33  
34       **Keywords:** SARS-CoV-2, Surveillance, Monitoring, Wastewater, Tucumán,

36 *Abstract*

37 Epidemiology based on the detection of pathogens in wastewater is extremely useful in  
38 providing information about a population's health status. This study aimed to analyze and report  
39 the epidemiological dynamics of SARS-CoV-2 in the province of Tucumán, Argentina during  
40 the second and third surges of COVID-19 between April 2021 and March 2022. The study  
41 aimed to quantify SARS-CoV-2 RNA in wastewater, correlating it with clinically reported  
42 COVID-19 cases. Wastewater samples (n=72) were collected from 16 sampling points located  
43 in 3 cities of Tucumán (San Miguel de Tucumán, Yerba Buena y Banda del Río Salí). Detection  
44 of viral nucleocapsid markers (N1 gene) was carried out using one-step RT-qPCR. Viral loads  
45 were determined for each positive sample using a standard curve. A positive correlation  
46 ( $p<0.05$ ) was observed between viral load (copies/mL) and the clinically confirmed COVID-19  
47 cases reported during the sampling period in San Miguel de Tucumán. Our research findings  
48 provided a crucial insight into the dynamics of SARS-CoV-2 infection during epidemic  
49 outbreaks. The implementation of wastewater monitoring has proven to be an invaluable  
50 epidemiological tool, facilitating early detection of potential surges in COVID-19 cases, and  
51 enabling a comprehensive tracking of the pandemic. Our study underscores the significance of  
52 incorporating SARS-CoV-2 genome-based surveillance as a standard practice which will  
53 contribute to anticipating any future spikes in infections.

54

## 55 INTRODUCTION

56 The Coronavirus disease 2019 (COVID-19) pandemic has caused significant public health  
57 concerns, declared a global health emergency by the World Health Organization (WHO). As of  
58 October 25, 2023, the COVID-19 pandemic has caused 771,549,718 reported cases and  
59 6,974,473 deaths worldwide (WHO, 2023).

60 COVID-19 is the result of an infection with SARS-CoV-2 (SARS Coronavirus 2), an  
61 enveloped, positive-sense single-stranded RNA virus belonging to the Order Nidovirales,  
62 Family Coronaviridae, genus Betacoronavirus (Alexandersen et al., 2020; Kadam et al., 2021;  
63 Shereen et al., 2020; Zhou et al., 2020; Zhu et al., 2020).

64 Human-to-human transmission occurs through droplets, aerosols, and contaminated surfaces  
65 originating from an infected person's breath secretions (Jones et al., 2020; Sharma et al., 2021).  
66 Patients infected with SARS-CoV-2 exhibit diverse symptoms, including fever, cough,  
67 shortness of breath, sore throat, and headaches. Clinical manifestations vary from asymptomatic  
68 infection or mild respiratory disease to severe pneumonia, respiratory failure, and even multi-  
69 organ failure (Guan et al., 2020; Jiang et al., 2020). Gastrointestinal symptoms, such as nausea,  
70 vomiting, loss of appetite, diarrhoea, and abdominal pain, have also been reported (Adhikari et  
71 al., 2022; Kariyawasam et al., 2021; Megyeri et al., 2021). Notably, the gastrointestinal tract  
72 contains a substantial amount of angiotensin-converting enzyme 2 (ACE-2), a receptor used by  
73 SARS-CoV-2 for cell entry (Hamming et al., 2004; Lee et al., 2020; Lewandowski et al., 2023).  
74 This allows the virus to infect human enterocytes in the gastrointestinal tract, leading to viral  
75 replication and excretion in faeces (Jones et al., 2020). Therefore, SARS-CoV-2 RNA is  
76 commonly detected in wastewater, with concentrations of up to 10<sup>7</sup> copies per g (Ahmed et al.,  
77 2020a; Thompson et al., 2020).

78 Wastewater-based epidemiology (WBE) is a methodology that allows an assessment of the  
79 population's exposure to infectious agents such as SARS-CoV-2. WBE offers valuable  
80 information on the temporal and spatial dynamics of population exposure. It provides  
81 information on a community's health status concerning etiological agents found mainly in  
82 human faeces or urine. (Ahmed et al., 2021; Giraud-Billoud, 2021; Prado et al., 2021; Randazzo  
83 et al., 2020).

84 Given the magnitude of the COVID-19 crisis, there is a pressing need for integrated alert and  
85 surveillance systems to detect and model SARS-CoV-2 infections. Accurate assessment of the  
86 number of infected individuals is challenging, especially due to a significant proportion of  
87 carriers displaying mild or no symptoms but capable of excreting and transmitting the virus

88 (Maréchal et al., 2023; Rothe et al., 2020). Sewage surveillance can monitor virus circulation in  
89 the community, covering both symptomatic and asymptomatic carriers. Moreover, WBE can  
90 serve as an early warning system for SARS-CoV-2, outbreak detection, and identification of  
91 circulating strains (Li et al., 2023). Furthermore, the use of WBE for the detection of SARS-  
92 CoV-2 RNA in wastewater may provide early indicators of an increase in clinical cases at the  
93 population level (Ahmed et al., 2020b; Ahmed et al., 2021; Larsen and Wigginton, 2020;  
94 Medema et al., 2020).

95 This study represents the first attempt to monitor SARS-CoV-2 epidemiological evolution using  
96 WBE analysis in Tucumán, Argentina. The study involved the analysis of wastewater samples  
97 collected during the COVID-19 pandemic between April 2021 and March 2022 from various  
98 sources, including manholes, wastewater treatment plants, and hospital effluent exits. These  
99 samples were subjected to viral concentration and RNA isolation methods, followed by  
100 quantification of SARS-CoV-2 nucleocapsid markers by RT-qPCR. Finally, this study  
101 correlated the number of genetic copies of the SARS-CoV-2 N1 gene in wastewater with  
102 reported COVID-19 cases.

103

## 104 **MATERIALS AND METHODS**

### 105 *2.1 Wastewater sampling*

106 Tucumán province is in the Northwest of Argentina with a population of 1.703.186  
107 inhabitants (<http://estadistica.tucuman.gov.ar/index.php/censo-2022>). Seventy-two wastewater  
108 samples were collected between April 2021 and March 2022. The sampling period covered the  
109 2<sup>nd</sup> and 3<sup>rd</sup> wave of COVID-19 pandemic in Tucumán. The samples were collected from various  
110 sources: manholes located in San Miguel de Tucumán (n9) and Yerba Buena (n4), a wastewater  
111 treatment plant (WWTP), (n1) located in San Miguel of Tucumán and the wastewater inspection  
112 chambers of two hospitals, one located in San Miguel de Tucumán (n1) and the other in Banda  
113 del Río Salí (n1). All samples were taken early in the morning by collecting 500 mL of water in  
114 sterilized plastic containers. The collected samples were brought on ice to the laboratory for  
115 processing within 24 hours. No precipitation or storms occurred on or before the sampling days.

116

### 117 *2.2. PEG concentration method*

118 The samples were thermally inactivated to increase the safety of their handling (Hasan et al.,  
119 2021; Pastorino et al., 2020). PEG-based viral concentration method was used, which according  
120 to the literature is one of the most efficient methods in terms of viral recovery (Barril et al.,  
121 2021; Iwai et al., 2009; Thongprachum et al., 2018). 200 mL was transferred to a sterile glass  
122 bottle with a screw cap containing 20 g of 8% (w/v) polyethylene glycol (PEG) 6000 (Sigma

123 Aldrich SRL, Argentina) and 4.5 g of 0.2 M (p/v) (Cicarelli). It was shaken to homogenize, and  
124 the mixture was allowed to stand overnight at 4°C for viral precipitation. Viruses were  
125 concentrated by two-step centrifugation, 7670 g for 10 min and then 7990 g for 1 h at 4°C. The  
126 pellet was suspended in 1 mL of TRI Reagent® (Molecular Research Center, Inc) to obtain the  
127 homogenate) and stored at -70°C.

128

### 129 *2.3. SARS-CoV-2 RNA purification*

130 Viral RNA was extracted from TRI Reagent® (Molecular Research Center) homogenate and  
131 purified by using a Puro Virus RNA (Productos Bio-Lógicos, Argentina), according to the  
132 manufacturer's instructions. Briefly, 140 µl of the TRI Reagent homogenate was mixed with  
133 560 µl of lysis buffer A plus ARN Carrier (10,7 ug/mL) and subjected to pulse-vortexing for 15  
134 seg and incubated for 15 min at room temperature. Then, 560 µl of cold 100% ethanol was  
135 added and incubated for 5 min at room temperature. The lysate was transferred to the column  
136 and centrifuged at 6000 g for 1 min. Then was washed with buffer w1, centrifuged at 6000 g for  
137 1 min, and continued with two washes with buffer w2. The column was then dried by  
138 centrifuging at 12,000 g for 3 min and then RNA elution was performed in 50 µl of RNase-free  
139 water by centrifugation at 12,000 g for 1 min. Purified RNA was stored at -80 °C. The  
140 concentration and quality of RNA were measured using a µDrop Plate (Thermo Scientific).

141

### 142 *2.4. Detection of SARS-CoV-2 genetic marker in wastewater samples*

143 Detection of SARS-CoV-2 genetic marker from wastewater was carried out by one-step RT-  
144 qPCR. The N-gene encoding the viral nucleocapsid (N) was amplified as target using the  
145 primers 2019-nCoV\_N1F: GACCCCAAATCAGCGAAAT, 2019-nCoV\_N1R:  
146 TCTGGTACTGCCAGTTGAATCTG and the probe was, 2019-nCoV\_N1P: FAM-  
147 ACCCCGCATTACGTTTGGTGGACC-BHQ1, validated by the US Centers for Disease  
148 Control and Prevention (CDC, 2020) (Lednický et al., 2020). RT-qPCR mix was prepared using  
149 qScript XLT 1-Step RT-PCR (Quantabio) in a one-step system. Reaction mix (10 µl) consisted  
150 of One Step RT master Mix, Qscript ROX Reference Dye, 0.50 pmol/mL REV primer, 0.5  
151 pmol/mL FW primer and 0.25 pmol/mL FAM labeled TaqMan probe, nuclease-free water. A  
152 real-time (RT-qPCR) assay was performed in a StepOnePlus™ Real-Time PCR System  
153 (Applied Biosystems). The RT qPCR program set up was, one cycle for retrotranscription at  
154 50°C for 10 min, then a preheating at 95 °C for 1min and 45 cycles of amplification at 95 °C for  
155 10 s, and 60 °C for 1 min. Each RNA was analyzed in duplicate, and every RT-qPCR assay  
156 included negative (nuclease-free water) and positive controls.

157

### 158 *2.5. Quantification of SARS-CoV-2 in wastewater samples*

159 The viral load in those wastewater samples that tested positive for SARS-CoV-2 RNA was  
160 quantified using a standard curve of a plasmid containing the SARS-CoV-2 N gene (2019-  
161 nCoV\_N\_Positive Control, IDT). Linear dynamic range was evaluated among 50 and 200000  
162 genetic copies. The standard curve used had an  $R^2$  value of 0.995 (slope = -3.5167; y-intercept =  
163 32.86). The results were expressed as the number of genetic copies in 1 mL of wastewater  
164 (copies/mL).

165

## 166 2.6. Statistical analysis

167 Pearson's correlations analyses were performed to test the correlation between COVID-19  
168 cases and the number of genetic copies by 1 mL of wastewater samples. The significance level  
169 was fixed at  $p < 0.05$ .

170

## 171 2.7. Variables related to epidemiological surveillance

172 All epidemiological data covering the period from April 2021 to March 2022, considered in  
173 this investigation, were provided by the environmental department of the Ministry of Health of  
174 Tucumán.

175

# 176 RESULTS

## 177 3.1. Epidemiological data in the Tucumán province, Argentina

178 The evolution of daily COVID-19 cases in Tucumán during the first, second, and third  
179 waves is shown (Figure 1). There were over 90% of cases reported in the metropolitan area of  
180 Tucumán, which covers four different districts of the province: Capital San Miguel de  
181 Tucumán, Cruz Alta, Yerba Buena, Tafí Viejo and Lules. The first wave occurred during the  
182 second semester of 2020: the second week of August to the end of November with a peak on  
183 October 15, where approx. 1300 daily cases were recorded. In 2021, a second wave lasted 24  
184 weeks, from March to August. Daily cases increased from 166 in early March to 755 in mid-  
185 April. Movement restrictions were imposed on April 8, followed by a confinement declaration  
186 on May 22. June showed a peak with up to 1400 cases/day, with 155345 confirmed cases in the  
187 province as of June 28, 2021. 65% of these cases were concentrated in San Miguel de Tucumán.  
188 A significant decrease in cases occurred from August, with fewer than 50 confirmed daily cases  
189 until December. A subsequent increase in cases was observed during the third wave, which  
190 extended from mid-December to mid-February. On January 10, 6500 positive cases were  
191 recorded. By March 2022, cases had dropped to five per day.

192

## 193 3.2 SARS-CoV-2 genetic marker detection in wastewater

194 Taking into account the above-referred epidemiological context, wastewater sampling was  
195 conducted during the second and third waves; more specifically in April, June, September,  
196 December (2021) and March 2022. In total, 13 manholes from the cities with the most reported  
197 cases were sampled: San Miguel de Tucumán (n9) and Yerba Buena (n4). In addition, the main  
198 wastewater treatment plant of the metropolitan area, San Felipe, was sampled for a general  
199 reference together with two COVID19-reference hospitals' sewage systems (positive controls):  
200 i) Zenón J. Santillán Health Center (San Miguel de Tucumán); ii) Eva Perón Hospital (Banda  
201 del Río Salí, Cruz Alta). Figure 2.a shows the geolocation of each sampling point (Table 1).

202 Over time, we analysed 72 samples and detected SARS-CoV-2 RNA via RT-qPCR. The  
203 average Cq values collected from manhole wastewater samples were as follows: April 2021  
204 ( $29.73 \pm 4.55$ ), June 2021 ( $32.78 \pm 1.73$ ), September 2021 ( $41.24 \pm 0.51$ ), and December 2021  
205 ( $39.02 \pm 4.11$ ) (mean  $\pm$  SEM). The Cq values correspond to the San Felipe wastewater treatment  
206 plant (SP7), and the wastewater inspection chamber of the Centro de Salud Zenón J. Santillán  
207 (SP8) and Eva Perón (SP9) hospitals (supplementary material).

208 All sampling points, except SP1 and SP2, showed evidence of SARS-CoV-2 at least once  
209 during the sampling period. Specifically, SP3 exhibited a low viral load in September 2021.  
210 Additionally, sample points 12, 14, and 15 were only detected in June. Table 2 summarizes  
211 RNA viral load data for each sampling point during the second wave. In April 2021, 6 out of 16  
212 samples tested positive. The highest viral load was observed at SP4. June 2021 sampling,  
213 coinciding with the second wave, yielded 9 positive samples out of 16. In September 2021, 5 of  
214 8 points analysed in San Miguel de Tucumán turned positive. In December 2021, 10 out of 16  
215 samples tested positive. On the other hand, sites SP5, SP11, and SP16 only showed virus  
216 presence in December. No viral RNA was detected in the March 2022 samples.

217

### 218 *3.3 Relationship between SARS-CoV-2 viral load and cases of Covid 19 in Tucumán*

219 We analysed the relationship between the SARS-CoV-2 viral loads and the number of cases  
220 based on the detection of the N1 marker in the COVID-19 cases registered in each city during  
221 the second and third emergences of COVID-19 to obtain a global perspective of the viral load  
222 and the number of cases. Among the points that have shown detectable viral load over time  
223 (Figure 3), are SP4, SP7, and SP8 from San Miguel de Tucumán, SP10 and SP13 in Yerba  
224 Buena, and SP9 in Banda del Ro Sal. The viral load obtained for sampling points SP4, SP7, and  
225 SP8 were related to the positive cases of COVID-19 registered in San Miguel de Tucumán on  
226 the sampling day during the months of analysis. Figure3.a allows us to observe a high viral load  
227 in SP4 at the beginning of sampling (250142.49 copies/mL). On the other hand, in June, when  
228 positive cases peaked, a viral load of 3229.37 copies/mL was detected. Then in September, the

229 viral load recorded was very low, 5.6 copies/mL, and remained at low levels in December, when  
230 an increase in positive cases was recorded (10.48 copies/mL). In March, no viral load was  
231 detected. Figure 3.b shows the relationship between the SARS-CoV-2 viral load detected at the  
232 entrance to the San Felipe wastewater treatment plant (SP7) with positive COVID-19 cases. In  
233 this scenario, we observed an initial viral load of 1451.06 copies/mL in April, which  
234 subsequently increased to 5334.32 copies/mL by June, coinciding with an increase in positive  
235 cases. In September it dropped to 12.54 copies/mL and remained very low during December at  
236 1.13 copies/mL, becoming undetectable in March 2022. Figure 3.c shows the relationship of the  
237 viral load with positive cases at The Health Center (Zenon J. Santillán). The viral load in the  
238 April sample was 5222.14 copies/mL, experiencing a substantial surge to 32725.17 copies/mL  
239 in June. Subsequently, in September, the recorded viral load markedly decreased to a mere  
240 28.86 copies/mL, only to rise again to 12260.28 copies/mL in December. The situation took a  
241 positive turn by March 2022, as no viral RNA was detected at that point. We performed a  
242 correlation analysis between COVID-19 cases and the load of the SARS-CoV-2 N1 marker in  
243 the samples. The Spearman test showed values of  $r_s = 0.9$ ,  $p$  (2-tailed) = 0.03739, evidencing a  
244 statistically significant association for both variables. Figure 3.d shows the relationship between  
245 the SARS-CoV-2 viral load in SP9 wastewater, and the COVID-19 cases recorded in Cruz Alta  
246 during the test months. In April, the viral load was 333.06 copies/mL, in June a notable increase  
247 was observed to 6041.19 copies/mL, while in December a sharp decrease was recorded at 1.78  
248 copies/mL, becoming undetectable in March 2022. Figure 3.e enables us to examine the  
249 correlation between viral load and positive cases at SP10 and SP13 points, which are associated  
250 with manholes situated in the city of Yerba Buena. The patterns observed for both were quite  
251 alike; consequently, the viral loads documented in April were 1066.21 copies/mL for SP10 and  
252 1966.81 copies/mL for SP13, respectively. In June, at both points an increase was detected to  
253 2708.26 and 2228.73 copies/mL for SP10 and SP13 respectively, coinciding with an increase in  
254 the number of confirmed positive cases for COVID-19. In September, a notable decrease was  
255 recorded at both points 28.79 and 4.99 copies/mL for SP10 and SP13 respectively. Finally, in  
256 March 2022, no N1 marker of SARS-CoV-2 was detected.

257

## 258 **DISCUSSION**

259 In Argentina, from 3 January 2020 to 8:20 am CEST, 19 July 2023, there have been  
260 10,044,957 confirmed cases of COVID-19 with 130,472 deaths, reported to WHO. As of 7  
261 October 2022, a total of 109,652,736 vaccine doses have been administered. The first wave  
262 lasted 12 weeks with a peak in October 2020, while the second wave lasted about 24 weeks with  
263 an epidemic peak in June 2021. In this work, sampling was carried out in April, June,  
264 September, December 2021, and March 2022. It is important to note that in 2021, on April 8, a  
265 movement restriction was established since the second surge of COVID-19. As of June 28,



266 2021, confirmed cases in the province of Tucumán amounted to 155,345 from 591,339 studied  
267 samples. The cumulative index per 10,000 inhabitants was 916.7. During the second wave, 65%  
268 of the cases in the entire province correspond to San Miguel de Tucumán.

269 Detection of SARS-CoV-2 RNA in wastewater has been reported worldwide (Ahmed et al.,  
270 2020; La Rosa et al., 2020; Wani et al., 2023; Wu et al., 2020). These studies show the  
271 usefulness of monitoring viral RNA in wastewater for surveillance of SARS-CoV-2 infection at  
272 the level of the entire population. SARS-CoV-2 monitoring in the WBE is based on the  
273 excretion of the virus through the gastrointestinal system. In this way, viral genetic material can  
274 be detected in drainage as well as in wastewater treatment plants (Ahmed et al., 2021; Atoui et  
275 al., 2023), even before COVID-19 patients are detected in the population and up to 21 days after  
276 the number of diagnosed cases decreases to baseline (Amirian, 2020; Yeo et al., 2020). The  
277 present article is part of a federal research program aimed at examining wastewater to evaluate  
278 the circulation of the SARS-CoV-2 virus in Argentina during the pandemic.  
279 The investigations provided epidemiological data concerning different provinces; Buenos Aires  
280 (Barrios et al., 2021; Iglesias et al., 2021), Santa Fé (Reno et al., 2022), Mendoza (Giraud-  
281 Billoud, et al., 2021), Córdoba (Masachessi et al., 2022), Salta (Cruz et al., 2023; Maidana-  
282 Kulesza, et al., 2022). It is the first surveillance report carried out in the Province of Tucumán to  
283 develop a strategy for detecting SARS-CoV-2 at the city level from wastewater. Viruses must  
284 be recovered from these samples. Different strategies are used, including precipitation with  
285 (PEG) for viral concentration (Ahmed et al., 2020a; Wu et al., 2020), of which there are  
286 variants. In this work, SARS-CoV-2 was concentrated from wastewater by PEG precipitation.  
287 These approaches have already been used to recover SARS-CoV-2 from environmental water  
288 samples (Barril et al., 2021; La Rosa et al., 2020; Pérez-Cataluña et al., 2021; Randazzo et al.,  
289 2020) because they demonstrated adequate viral recoveries when wastewater matrices were  
290 artificially seeded with SARS-CoV-2 (Ahmed et al., 2020a; Barril et al., 2021; Lewis and  
291 Metcalf, 1988). In addition, it has been reported as a method that allows satisfactory recovery at  
292 a low cost (Wani et al., 2023). We detected SARS-CoV-2 RNA by RT-qPCR using N1 primer  
293 sets, already used and validated for clinical laboratory testing. In this work, the first sample was  
294 taken on April 5, during the beginning of the second wave of COVID-19. Although 6 of the 16  
295 spots were positive, in SP4 we detected a large increase in the N1 marker for SARS-CoV-2  
296 (copies/mL), a few days before COVID-19 cases increased (Table 2). At this time, in Argentina,  
297 the movement restriction was established due to a sustained increase in the curve of daily cases  
298 during the last four weeks in the city of Buenos Aires, and in nine provinces including Tucumán  
299 (Directorate of Epidemiology of the Ministry of Health of the Nation, 2021). In a study  
300 conducted in Santa Fé, Argentina, increases in genetic markers N1 and N2 in wastewater  
301 treatment plants occurred 3 to 6 days before the weekly increase in COVID cases (Giraud-  
302 Billoud, et al., 2021). In New Haven, Connecticut, USA, Peccia et al. (2020) demonstrated that

303 SARS-CoV-2 RNA concentrations from primary sewage sludge were 1 to 4 days earlier than  
304 local hospital admissions and 6 to 8 days earlier than positive SARS-CoV-2 tests. Coinciding  
305 with the increase in the number of cases in June, when the peak of the second wave occurred,  
306 we recorded that a greater number of sampling points were positive compared to April (Table  
307 2). Our study describes low Ct values and high viral load (copies/mL) in both April and June  
308 2021. A positive correlation between SARS-CoV-2 viral load and its transmissibility has been  
309 reported (Dadras et al., 2022). In Tucumán, a peak of positive cases of Covid-19 was registered  
310 in June. Furthermore, at this time a mortality rate per million inhabitants of 10.0 was recorded.  
311 COVID-19 patients who have been treated in the intensive care unit with severe illness have  
312 been shown to have a relatively higher viral load (Abdulrahman et al., 2021). A study conducted  
313 in large hospitals suggested that a high viral load is associated with an increased risk of death  
314 (El Zein et al., 2021). Although there are no studies in our province that report the viral load of  
315 patients during the second wave, our results could be associated with the fact that many  
316 COVID-19-positive people have a high viral load. Indeed, people infected with SARS-CoV-2  
317 have been reported to shed the virus in feces for prolonged periods and with viral loads that can  
318 reach up to  $1 \times 10^6$  genomic copies (GC) per gram of fecal material (Amirian, 2020; Yeo et al.,  
319 2020). In September, positive sampling points showed a low viral load, which may be related to  
320 the decrease in the number of cases, as well as the increase in vaccination coverage. In  
321 Argentina, a decrease in the number of positive cases of COVID-19 has been observed since the  
322 beginning of August (data repository of the Center for Systems Science and Engineering  
323 (CSSE) at Johns Hopkins University). A similar pattern could be observed in Tucumán. In mid-  
324 August 2021, the percentage of vaccination coverage in both Argentina and Tucumán was 30%  
325 and in mid-December, it was 70%, while as of March 27, 2022, it reached 80% (Johns  
326 University Data Repository Hopkins Center for Systems Sciences and Engineering  
327 (CSSE)). According to CSSE, data repository at Johns Hopkins University, the increase in the  
328 percentage of the population vaccinated with full doses was associated with a decrease in the  
329 number of cases as well as a lower mortality rate evidencing the end of the second wave  
330 epidemic outbreak. Importantly, the protection of various vaccines against hospitalization and  
331 death from severe COVID-19 disease slowly decreased after a two-dose schedule of a global  
332 COVID-19 vaccine (Zhou et al., 2022). In December, 10 of the points analyzed were positive  
333 but with a very low viral load except for point SP8 corresponding to the Health Center Hospital  
334 (Table 2), possibly in relation to many people admitted to the COVID Unit. A few weeks later,  
335 the number of cases increased, leading to the third wave, with a peak of positive cases in  
336 January. During this period, a mortality rate per million inhabitants of 5.0 was reported with a  
337 vaccination coverage percentage of 80% at both the national and provincial levels. This increase  
338 in both the number of cases and mortality may be related to the circulation of the new variant  
339 B.1.1.529 “Omicron” (WHO, 2021). A decrease in the number of cases was then observed

340 nationally (Johns Hopkins University Center for Systems Science and Engineering (CSSE) data  
341 repository). In Tucumán, at the beginning of March 2022, between 30 and 45 cases per day  
342 were recorded, while towards the end of this month, they did not exceed 5 positive cases per  
343 day. Our analysis showed that all sampling points were undetectable for the SARS-CoV-2 N1  
344 marker. The limit of detection (LOD) of 2019-nCoV plasmid (CDC, USA) by RT-qPCR for N1  
345 and N2 is 25 copies/reaction.

346 When we analyze the positive sampling points in relation to the number of cases, we find a  
347 positive correlation for points SP4, SP7, and SP8 in the months of May and June. However, at  
348 other points, it was not possible. Many authors consider that the SARS-CoV-2 RNA content in  
349 wastewater is not necessarily proportional to the changes in confirmed cases (Ai et al., 2021;  
350 Faladori et al., 2020; Wu et al., 2020). Finally, the decrease in the detection of SARS-CoV-2  
351 positive samples in wastewater coincides with the decrease in confirmed clinical cases of  
352 COVID-19 that marks the end of the third wave of the COVID-19 epidemic.

353 Recent research considers that wastewater surveillance is essential for tracking the spread of  
354 SARS-CoV-2 among populations (Jiang et al., 2023; Pipes et al., 2022). Considering that  
355 wastewater represents a composite biological sample of the community, continuous monitoring  
356 could be increasingly useful in areas where clinical trial rates decline or resources for clinical  
357 trials are limited (Hoar et al., 2022). Along these lines, this work could contribute to building a  
358 WBE network with the aim of monitoring SARS-CoV-2 RNA in wastewater during the post-  
359 pandemic.

360

## 361 **CONCLUDING REMARKS AND PROSPECTS**

362 Our study spanned April 2021 to March 2022, covering the second and third waves of  
363 COVID-19 in Tucumán. During this time, wastewater samples were collected from various  
364 sources, including manholes, a wastewater treatment plant, and hospital effluent exits. Positive  
365 correlations were observed between SARS-CoV-2 viral load in wastewater and reported  
366 COVID-19 cases at specific sampling points (SP4, SP7, SP8, SP9, SP10, SP13). Notably, high  
367 viral loads coincided with peaks in COVID-19 cases, providing a potential indicator for  
368 epidemiological trends.

369 The study identified seasonal variations in SARS-CoV-2 RNA in wastewater, with higher  
370 viral loads during peak infection periods. Moreover, lower viral loads in September 2021  
371 aligned with decreased cases and increased vaccination coverage, highlighting the potential  
372 impact of vaccination efforts. Thus, our study emphasized the utility of WBE for early detection  
373 of SARS-CoV-2 and monitoring its circulation. The undetectability of SARS-CoV-2 RNA in  
374 wastewater samples in March 2022 corresponded with the decline in clinical cases, supporting  
375 the value of wastewater surveillance in post-pandemic monitoring.

376 This study represents the first attempt to monitor SARS-CoV-2 epidemiological evolution in  
377 Tucumán using WBE. Positive correlations between viral load and reported cases suggest the  
378 potential use of wastewater analysis as an early warning system. The findings underscore the  
379 importance of integrated alert and surveillance systems, especially in regions with varying  
380 vaccination coverage and evolving COVID-19 waves. In addition, our research contributes to  
381 the establishment of a WBE network for post-pandemic monitoring. Further investigations are  
382 currently in progress to unveil the dynamics of viral shedding in wastewater, considering  
383 variations in clinical cases, vaccination status, and the emergence of new variants. The expected  
384 results will have implications for public health strategies and the development of targeted  
385 interventions based on wastewater surveillance data in Tucumán, Argentina.

386

### 387 **1. Credit authorship contribution statement**

388 VHA, AB, MLS, EMH, and GG had the original research idea and designed the project.  
389 MCD, PES, AB, and MLS designed and performed the experiments. JM, SG and REC designed  
390 and performed the sampling and provided the epidemiological data. MCD, PES, WW and GG  
391 analysed the experimental and epidemiological data and produced the figures and tables. VHA,  
392 AB, MLS, EMH and GG obtained and executed funding for the original project idea. VHA, AB,  
393 MAM and REC provided instrumentation, consumables, logistics and infrastructure for the  
394 execution of the experiments. MCD, PES and VHA wrote the paper. AB, MLS, EMH, GG and  
395 MAM edited and critically analysed the manuscript. All authors read and approved the final  
396 version of the manuscript.

397

### 398 **2. Acknowledgements**

399 The authors acknowledge the generous financial support by the National Council of Research  
400 and Technology (CONICET) and Ministry of Science, Technology and Innovation of Argentina  
401 (MINCyT) through “PROGRAMA DE ARTICULACIÓN Y FORTALECIMIENTO  
402 FEDERAL DE LAS CAPACIDADES EN CIENCIA Y TECNOLOGÍA COVID-19”. This  
403 work was funded by the project TUC-03-COVID19 “COVID-U-MAP”, included in the Bank  
404 of Technological and Social Development Projects of CONICET (PDTS). Our group was part  
405 of the “Federal Network for COVID detection in the environment”, Unidad Coronavirus,  
406 MINCyT. The project received financial support of the Provincial Health Ministry in the frame  
407 of COVID19 Research Program, processed by a specific agreement between the Superior  
408 Government of the Province of Tucumán, the National University of Tucumán and CONICET.  
409 MCD had a postdoctoral research scholarship from CONICET. VHA, AB, MLS, EMH, PES,  
410 and MAM are CONICET researchers.

411

### 412 **3. Declaration of competing interest**

413 The authors have declared that no competing interests exist.

414

#### 415 4. References

416

417 Abdulrahman, A., Mallah, S.I., Alqahtani, M., 2021. COVID-19 viral load not associated with  
418 disease severity: findings from a retrospective cohort study. *BMC Infect Dis.* 21(1):688.

419

420 Adhikari U.D., Eng, G., Farcasanu, M., Laura E Avena' L.E., Choudhary, M.C., Triant' V.A., et  
421 al., 2022. Fecal Severe Acute Respiratory Syndrome Coronavirus 2 (SARS-Cov-2) RNA Is  
422 Associated with Decreased Coronavirus Disease 2019 (COVID-19) Survival. *Clin Infect Dis.*,  
423 74(6):1081-1084.

424

425 Ahmed, W., Angel, N., Edson, J., Bibby, K., Bivins, A., O'Brien, J.W., et al., 2020b. First  
426 confirmed detection of SARS-CoV-2 in untreated wastewater in Australia: a proof of concept  
427 for the wastewater surveillance of COVID-19 in the community. *Sci Total*  
428 *Environ.* 1:728:138764.

429

430 Ahmed, W., Bivins, A., Bertsch, P.M., Bibby, K., Choi, P.M., Farkas, K., 2020a. Surveillance  
431 of SARS-CoV-2 RNA in wastewater: Methods optimisation and quality control are crucial for  
432 generating reliable public health information. *Curr Opin Environ Sci Health.* 17:100209.

433

434 Ahmed, W., Tschärke, B., Bertsch, P.M., Bibby, K., Bivins, A., Choi, P., et al., 2021. SARS-  
435 CoV-2 RNA monitoring in wastewater as a potential early warning system for COVID-19  
436 transmission in the community: a temporal case study. *Sci. Total Environ.* 761, 144216.

437

438 Ai, Y., Davis, A., Jones, D., Lemeshow, S., Tu, H., He, F., et al., 2021. Wastewater SARS-  
439 CoV-2 monitoring as a community-level COVID-19 trend tracker and variants in Ohio, United  
440 States. *Sci Total Environ* 801:149757.

441

442 Alleman, M.M., Coulliette-Salmond, A.D., Wilnique, P., Belgasmi-Wright, H., Sayyad, L.,  
443 Wong, K., et al., 2021. Environmental surveillance for polioviruses in haïti (2017–2019): the  
444 dynamic process for the establishment and monitoring of sampling sites. *Viruses* 13:505.

445

446 Alexandersen, S., Chamings, A. and Bhatta, T.R. 2020. SARS-CoV-2 genomic and subgenomic  
447 RNAs in diagnostic samples are not an indicator of active replication. *Nat Commun.*, 11, 6059.

448

- 449 Amirian, S., 2020. Potential fecal transmission of SARS-CoV-2: Current evidence and  
450 implications for public health. *Int J Infect Dis.*, 95:363-370.  
451
- 452 Atoui, A., Cordevant, C., Chesnot, T., Gassilloud, B., 2023. SARS-CoV-2 in the environment:  
453 Contamination routes, detection methods, persistence and removal  
454 in wastewater treatment plants. *Sci Total Environ.*, 881:163453.  
455
- 456 Barril, P., Giordano, M., Isa, M., Masachessi, G., Ferreyra, L., Castello, A., et al., 2010.  
457 Correlation between rotavirus a genotypes detected in hospitalized children and sewage samples  
458 in 2006, Córdoba, Argentina. *J. Med. Virol.*, 82, 1277–1281.  
459
- 460 Barrios, M.E., Sofía Micaela Díaz, S.M., Torres, C., Costamagna, D.M., Blanco Fernández,  
461 M.D., Mbayed, V.A., 2021. Dynamics of SARS-CoV-2 in wastewater in three districts of the  
462 Buenos Aires metropolitan region, Argentina, throughout nine months of surveillance: A pilot  
463 study. *Sci Total Environ.*, 800:149578.  
464
- 465 CDC, 2020. CDC 2019-novel coronavirus (2019-nCoV) real-time RT-PCR diagnostic panel  
466 [WWW Document]. URL. <https://www.fda.gov/media/134922/download>.  
467
- 468 Cruz, M.C., Sanguino-Jorquera, D., Aparicio González, M., Irazusta, V.P., Poma, H.R.,  
469 Cristóbal H.A., Rajal, V.B., 2023. Sewershed surveillance as a tool for smart management of a  
470 pandemic in threshold countries. Case study: Tracking SARS-CoV-2 during COVID-19  
471 pandemic in a major urban metropolis in northwestern Argentina. *Sci Total Environ.*,  
472 862:160573.  
473
- 474 Dadras, O., Afsahi, A.M., Pashaei, Z., Mojdeganlou, H., Karimi, A., Habibi, P., 2022. The  
475 relationship between COVID-19 viral load and disease severity: A systematic review.  
476 *ImmunInflamm Dis.* 2022 Mar;10(3): e580.  
477
- 478 El Zein, S., Chehab, O., Kanj, A., Akrawe, S., Alkassis, S., Mishra, T., et al., 2021. SARS-CoV-2  
479 infection: initial viral load (iVL) predicts severity of illness/outcome, and declining trend of iVL  
480 in hospitalized patients corresponds with slowing of the pandemic. *PLoSOne.* 16(9): e0255981.  
481
- 482 Foladori, P., Cutrupi, F., Segata, N., Manara, S., Pinto, F., Malpei, F., et al., 2020. SARS-CoV-2  
483 from faeces to wastewater treatment: what do we know? A review. *Sci Total Environ.*  
484 743:140444.  
485

- 486 Guan, W.-J., Ni, Z.-Y., Hu, Y., Liang, W.-H., Ou, C.-Q., He, J.-X., et al., 2020. Clinical  
487 characteristics of coronavirus disease 2019 in China. *N. Engl. J. Med.* 382(18):1708-1720.  
488
- 489 Hamming, I., Timens, W., Bulthuis, M., Lely, A., Navis, G., van Goor, H., 2004. Tissue  
490 distribution of ACE2 protein, the functional receptor for SARS coronavirus. A first step in  
491 understanding SARS pathogenesis. *J Pathol.*, 203:631e7.  
492
- 493 Hasan, S.W., Ibrahim, Y., Daou, M., Kannout, H., Jan, N., Lopes, A., et al., 2021. Detection and  
494 quantification of SARS-CoV-2 RNA in wastewater and treated effluents: surveillance of  
495 COVID-19 epidemic in the United Arab Emirates. *Sci Total Environ.* 764, 142929.  
496
- 497 Hirayama, T., Mizuno, Y., Takeshita, N., Kotaki, A., Tajima, S., Omatsu, T., Sano, K., Kurane,  
498 I., Takasaki, T., 2012. Detection of Dengue virus genome in urine by real-time reverse  
499 transcriptase PCR: a laboratory diagnostic method useful after disappearance of the genome in  
500 serum. *J Clin Microbiol.*, 50.  
501
- 502 Hoar, C., Chauvin, F., Clare, A., McGibbon, H., Castro, E., Patinella, S., et al., 2022.  
503 Monitoring SARSCoV-2 in wastewater during New York City's second wave of COVID-19:  
504 Sewershed-level trends and relationships to publicly available clinical testing data. *Environ.*  
505 *Sci.: Water Res. Technol.*, 8, 1021.  
506
- 507 Honda, R., Murakami, M., Hata, A., Ihara, M., 2021. Public health benefits and ethical aspects  
508 in the collection and open sharing of wastewater-based epidemic data on COVID-19. *Data Sci J*  
509 20.  
510
- 511 Iglesias, N.G., Gebhard, L.G., Carballeda, J.M., Aiello, I., Recalde, E., Terny, G., et al.,  
512 2021. SARS-CoV-2 surveillance in untreated wastewater: detection of viral RNA in a low-  
513 resource community in Buenos Aires, Argentina. *RevPanam Salud Publica.*45: e137.  
514
- 515 Jiang, G., Liu, Y., Tang, S., Kitajima, M., Haramoto, E., Arora, S., et al., 2023. Moving forward  
516 with COVID-19: Future research prospects of wastewater-based epidemiology methodologies  
517 and applications. *Curr Opin Environ Sci Health.*, 33:100458.  
518
- 519 Jiang, M.D., Zu, Z.Y., Schoepf, U.J., Savage, R.H., Zhang, X.L., Lu, G.M., Zhang, L.J., 2020  
520 Current Status of Etiology, Epidemiology, Clinical Manifestations and Imagings for COVID-19.  
521 *Korean J Radiol.*, 10:1138-1149.  
522

523 Jones, D.L., Baluja, M.Q., Graham, D.W., Corbishley, A., McDonald, J.E., Malham, S.K., et al.,  
524 2020. Shedding of SARS-CoV-2 in feces and urine and its potential role in person-to-person  
525 transmission and the environment-based spread of COVID-19. *Sci. Total Environ.* 749, 141364.  
526

527 Kadam, S.B., Sukhramani, G.S., Bishnoi, P., Pable, A.A., Vitthal T Barvkar, V.T., 2021. SARS-  
528 CoV-2, the pandemic coronavirus: Molecular and structural insights. *J Basic Microbiol.*,  
529 61(3):180-202.  
530

531 Kariyawasam, J.C., Jayarajah U., Riza, R., Abeysuriya, V., Seneviratne, S.L., 2021.  
532 Gastrointestinal manifestations in COVID-19. *Trans R Soc Trop Med Hyg.*, 115(12):1362-  
533 1388.  
534

535 Kawasuji, H., Takegoshi, Y., Kaneda, M., Ueno, A., Miyajima, Y., Kawago, K., et al., 2020.  
536 Transmissibility of COVID-19 depends on the viral load around onset in adult and symptomatic  
537 patients. *PLoS ONE* 15, e0243597.  
538

539 La Rosa, G., Iaconelli, M., Mancini, P., Bonanno Ferraro, G., Veneri, C., Bonadonna, L., et al.,  
540 2020. First detection OF SARS-COV-2 in untreated wastewaters in Italy.*Sci Total Environ*  
541 20:736:139652.  
542

543 Lamers, M.M., Beumer, J., van der Vaart, J., Knoops, K., Puschhof, J., Breugem, T.I, 2020.  
544 SARS-CoV-2 productively infects human gut enterocytes. *Science*, 369(6499):50-54.  
545

546 Larsen, D.A., Wigginton, K.R., 2020. Tracking COVID-19 with wastewater.*Nat Biotechnol.*,  
547 38(10):1151-1153.  
548

549 Lednicky, J.A., Lauzard, M., Fan, Z.H., Antarpreet Jutla, A., Trevor B Tilly, T.B., Gangwar,  
550 M., et al., 2020. Viable SARS-CoV-2 in the air of a hospital room with COVID-19 patients. *Int*  
551 *J Infect Dis.*, 100:476-482.  
552

553 Lee, J.J., Kopetz, S., Vilar, E., Shen, J.P., Chen, K., Maitra, A., 2020. .Relative Abundance of  
554 SARS-CoV-2 Entry Genes in the Enterocytes of the Lower Gastrointestinal Tract.*Genes*  
555 (Basel). 11(6):645.  
556

557 Lewandowski, K., Kaniewska, M., Rosołowski, M., Rydzewska, G., 2023. Gastrointestinal  
558 symptoms in COVID-19. *Prz Gastroenterol.*, 18(1):61-66.  
559



- 560 Lewis, D., Metcalf, T.G., 1988. Removal of viruses in sewage treatment: assessment of  
561 feasibility. *Microbiol Sci.*, 5(9):260-4.  
562
- 563 Li, X., Zhang, S., Sherchan, S., Orive, G., Lertxundi, U., Haramoto E., et al., 2023. Correlation  
564 between SARS-CoV-2 RNA concentration in wastewater and COVID-19 cases in community:  
565 A systematic review and meta-analysis. *J Hazard Mater.*, 441:129848.  
566
- 567 Ling, Y., Xu, S.-B., Lin, Y.-X., Tian, D., Zhu, Z.-Q., Dai, F.-H., et al., 2020. Persistence and  
568 clearance of viral RNA in 2019 novel coronavirus disease rehabilitation patients. *Chin. Med. J.*  
569 133, 1039–1043.  
570
- 571 Lodder, W., de Roda Husman, A.M., 2020. SARS-CoV-2 in wastewater: potential health risk,  
572 but also data source. *Lancet Gastroenterol. Hepatol.* (6):533-534.  
573
- 574 Maidana-Kulesza, M.N., Poma, H.R., Sanguino-Jorquera, D.G., Reyes, S.I., Del Milagro Said-  
575 Adamo, M, et al., 2022. Tracking SARS-CoV-2 in rivers as a tool for epidemiological  
576 surveillance. *Sci Total Environ.*, 848:157707.  
577
- 578 Maréchal, V., Maday, Y., Wallet, C., Cluzel, N., Borde, C., 2023. Wastewater-based  
579 epidemiology: Retrospective, current status, and future prospects. *Anaesth Crit Care Pain Med*,  
580 42(5):101251.  
581
- 582 Masachessi, G., Castro, G., Cachi, A.M., Marinzalda, M.L.Á, Liendo, M., Pisano, M.B., et al.,  
583 2022. Wastewater based epidemiology as a silent sentinel of the trend of SARS-CoV-  
584 2 circulation in the community in central Argentina. *Water Res.*, 219:118541.  
585
- 586 Medema, G., Been, F., Heijnen, L., Petterson, S., 2020. Implementation of environmental  
587 surveillance for SARS-CoV-2 virus to support public health decisions: opportunities and  
588 challenges. *Curr Opin Environ Sci Health*, 17:49–71.  
589
- 590 Megyeri, K., Dernovics, Á., Al-Luhaibi, Z.II., Rosztóczy, A., 2021. COVID-19-associated  
591 diarrhea. *World J Gastroenterol.*, 27(23):3208-3222.  
592
- 593 Pastorino, B., Touret, F., Gilles, M., de Lamballerie, X., Charrel, R.N., 2020. Heat Inactivation  
594 of Different Types of SARS-CoV-2 Samples: What Protocols for Biosafety, Molecular  
595 Detection and Serological Diagnostics? *12(7):735*.  
596

- 597 Peccia, J., Zulli, A., Brackney, D.E., Grubaugh, N.D., Kaplan, E.H., Casanovas-Massana, A., et  
598 al., 2020. Measurement of SARS-CoV-2 RNA in wastewater tracks community infection  
599 dynamics. *Nat. Biotechnol.* 38, 1164–1167.
- 600
- 601 Pérez-Cataluña, A., Cuevas-Ferrando, E., Randazzo, W., Falcó, I., Allende, A., & Sánchez, G.  
602 2021. Comparing analytical methods to detect SARS-CoV-2 in wastewater. *Science of the Total*  
603 *Environment.*, 758, 143870.
- 604
- 605 Pipes, L., Chen, Z., Afanaseva, S., Nielsen, R., 2022. Estimating the relative proportions of  
606 SARS-CoV-2 strains from wastewater samples. medRxiv.01.13.22269236.
- 607
- 608 Prado, T., Fumian, T.M., Mannarino, C.F., Resende, P.C., Motta, F.C., Eppinghaus, A.L.F., et  
609 al., 2021. Wastewater-based epidemiology as a useful tool to track SARS-CoV-2 and support  
610 public health policies at municipal level in Brazil. *Water Res.* 191, 116810.
- 611
- 612 Randazzo, W., Truchado, P., Cuevas-Ferrando, E., Simón, P., Allende, A., Sánchez, G., 2020.  
613 SARS-CoV-2 RNA in wastewater anticipated COVID-19 occurrence in a low prevalence area.  
614 *Water Res.* 181, 115942.
- 615
- 616 Reno, U., Regaldo, L., Ojeda, G., Schmuck, J., Romero, N., Polla, W., et al., 2022. Wastewater-  
617 Based Epidemiology: Detection of SARS-CoV-2 RNA in Different Stages of  
618 Domestic Wastewater Treatment in Santa Fe, Argentina. *Water Air Soil Pollut.*  
619 2022;233(9):372.
- 620
- 621 Rothe, C., Schunk, M., Sothmann, P., Bretzel, G., Froeschl, F., Wallrauch, C., et al., 2020.  
622 Transmission of 2019-nCoV Infection from an Asymptomatic Contact in Germany. *N Engl J*  
623 *Med.*, 382(10):970-971.
- 624
- 625 Sharma, V.K., Jinadatha, C., Lichtfouse, E., Decroly, E., van Helden, J., Choi, H., et al., 2021.  
626 COVID-19 epidemiologic surveillance using wastewater. *Environ. Chem. Lett.* 19, 1911–1915.
- 627
- 628 Shereen, M.A., Khan, S., Kazmi, A., Bashir, N., Siddique, R. 2020. COVID-19 infection:  
629 origin, transmission, and characteristics of human coronaviruses. *J Adv Res.*, 24:91-8.
- 630
- 631 Thompson, J.R., Nancharaiah, Y.V., Gu, X., Lee, W.L., Rajal, V.B., Haines, M.B., et al.,  
632 2020. Making waves: wastewater surveillance of SARS-CoV-2 for population-based health  
633 management. *Water Res.* 184, 116181.

634

635 Thongprachum, A., Fujimoto, T., Takanashi, S., Saito, H., Okitsu, S., Shimizu, H., et al., 2018.  
636 Detection of nineteen enteric viruses in raw sewage in Japan. *H. Infect Genet Evol.*, 63:17-23.

637

638 Wang, C., Horby, P.W., Hayden, F.G., Gao, G.F., 2020. A novel coronavirus outbreak of global  
639 health concern. *Lancet* 395, 470–473.

640

641 Wang, X., Zheng, J., Guo, L., Yao, H., Wang, L., Xia, X., et al., 2020. Fecal viral shedding in  
642 COVID-19 patients: clinical significance, viral load dynamics and survival analysis. *Virus Res*,  
643 289:198147.

644

645 Wani, H., Menon, S., Desai, D., D'Souza, N., Bhatena, Z., Desai, N., 2023. Wastewater-  
646 Based Epidemiology of SARS-CoV-2: Assessing Prevalence and Correlation with Clinical  
647 Cases. *ood Environ Virol.*, 15(2):131-143.

648

649 Weidhaas, J., Aanderud, Z.T., Roper, DK., VanDerslice, J., Gaddis, E.B., Ostermiller, J., et al.,  
650 2021. Correlation of SARS-CoV-2 RNA in wastewater with COVID-19 disease burden in sewer  
651 sheds. *Sci Total Environ*, 775:145790.

652

653 WHO. Classification of Omicron (B.1.1.529): SARS-CoV-2 Variant of Concern. Accessed 20  
654 October 2023. [https://www.who.int/news/item/26-11-2021-classification-of-omicron-](https://www.who.int/news/item/26-11-2021-classification-of-omicron-(b.1.1.529)-sars-cov-2-variant-of-concern)  
655 [\(b.1.1.529\)-sars-cov-2-variant-of-concern](https://www.who.int/news/item/26-11-2021-classification-of-omicron-(b.1.1.529)-sars-cov-2-variant-of-concern).

656

657 World Health Organization. WHO Coronavirus (COVID-19) Dashboard.  
658 <https://covid19.who.int/>. Accessed 26th Oct 2023.

659

660 Wu, F., Xiao, A., Zhang, J., Gu, X., Lee, W.L., Kauffman, K., et al., 2020a. SARS-CoV-2 titers  
661 in wastewater foreshadow dynamics and clinical presentation of new COVID-19 cases.  
662 medRxiv. 06.15.20117747.

663

664 Wu, F., Zhang, J., Xiao, A., Gu, X., Lee, W.L., Armas, F., et al., 2020b. SARS-CoV-2 titers in  
665 wastewater are higher than expected from clinically confirmed cases. *mSystems*. 5(4): e00614-  
666 20.

667

668 Xiao, F., Tang, M., Zheng, X., Liu, Y., Li, X., Shan, H., 2020. Evidence for gastrointestinal  
669 infection of SARS-CoV-2. *Gastroenterology* 158, 1831–1833.

670

671 Yeo, C., Kaushal, S., Yeo, D., 2020. Enteric involvement of coronaviruses: is faecal–oral  
672 transmission of SARS-CoV-2 possible? *Lancet, Gastroenterol hepatol.*, 5(4) 335-7.

673

674 Zhou, P., Yang, X.L., Wang, X.G., Hu, B., Zhang, L., Zhang, W., et al.,  
675 2020. A pneumonia outbreak associated with a new coronavirus of probable bat origin. *Nature*.  
676 579(7798):270-273.

677

678 Zhou, Z., Zhu, Y., Chu, M., 2022. Role of COVID-19 Vaccines in SARS-CoV-2 Variants. *Front*  
679 *Immunol.*, 13:898192.

680

681 Zhu, N., Zhang, D.Y., Wang, W.L., Li, X., Yang, B., Song, J., et al., 2020. A novel coronavirus  
682 from patients with pneumonia in China, 2019. *N Engl J Med*, 382(8):727-733.

683

684

685

686

687

688

689

690

691

692

693

694

695

696

697

698

699

700

701

702

703

704

705

706

707 **Table 1:** Location and origin of the sampling points. Coordinates of each of the points, and the  
708 origin of the samples is also indicated. SP (Sample Point). SP 1, SP2, SP3, SP4, SP5, SP6,  
709 SP10, SP15, SP16 correspond to manholes in San Miguel de Tucumán. SP11, SP12, SP13, and  
710 SP14 correspond to Yerba Buena manholes. SP7 corresponds to the San Felipe sewage  
711 treatment plant entrance. SP 8 corresponds to the Health Center Zenon J. Santillan wastewater  
712 inspection chamber in San Miguel de Tucumán, and SP9 Eva Peron Hospital wastewater  
713 inspection chamber in the city of Banda del Rio Salí (Cruz Alta).

714

715 **Table 2:** Sars-CoV-2 viral load. Viral load calculated for each sampling point during the months  
716 of April, June, September, and December 2021 and March 2022. **Figure 1:** Epidemiological data  
717 of the SARS-CoV-2 pandemic in Tucumán. a, The curve of confirmed cases of Covid-19 in  
718 Greater San Miguel de Tucumán (light blue) and the interior of the province (dark blue) from  
719 June 2020 to March 2022. b, Temporal evolution of the weekly number of COVID-19 cases  
720 during the second and third waves in San Miguel de Tucumán, Yerba Buena, and Cruz Alta.

721

722 **Figure 1:** Epidemiological data of the SARS-CoV-2 pandemic in Tucumán. a, The curve of  
723 confirmed cases of Covid-19 in Greater San Miguel de Tucumán (light blue) and the interior of  
724 the province (dark blue) from June 2020 to March 2022. b, Temporal evolution of the weekly  
725 number of COVID-19 cases during the second and third waves in San Miguel de Tucumán,  
726 Yerba Buena, and Cruz Alta.

727

728 **Figure 2:** Sampling areas of the province of Tucumán, Argentina. The dotted line (a) shows the  
729 location of Tucumán. In b the markers indicate the cities in which sampling was carried out: San  
730 Miguel de Tucumán, Yerba Buena, and Banda del Río Salí. c the visualization of the different  
731 sampling points. The light blue circles show the location of each of the sites from which the  
732 samples were obtained.

733

734 **Figure 3:** Relationship between Sars-CoV-2 viral load and positive COVID-19 cases. a, in  
735 samples obtained from sewer SP4 in San Miguel de Tucumán; b, in samples taken from the San  
736 Felipe sewage treatment plant entrance (SP7); c, samples collected from inspection chamber of  
737 the Hospital Centro de Salud (Zenón J. Santillán) (SP8). a, b, and c correspond to points located  
738 in San Miguel de Tucumán sampled from April 5, 2021, to March 25, 2022. d, Viral load of  
739 Sars-CoV-2 in wastewater obtained from Eva Peron Hospital wastewater inspection chamber  
740 (SP9), this point is in Banda del Río Salí, Cruz Alta and was sampled from April 5, 2021, to  
741 March 25, 2022. e, Viral load of Sars-CoV-2 in wastewater obtained from sewers SP10 and  
742 SP13, both located in Yerba Buena. Samples were collected from April 5, 2021, to March 25,  
743 2022.

744

745

746

747

748

749 Table 1

| ID   | City              | Coordinates             | Source                                                         |
|------|-------------------|-------------------------|----------------------------------------------------------------|
| SP01 | SM. Tucumán       | -26.8388842-65.2148118  | Manhole                                                        |
| SP02 | SM. Tucumán       | -26.8383123-65.2220305  | Manhole                                                        |
| SP03 | SM. Tucumán       | -26.8309718-65.2309513  | Manhole                                                        |
| SP04 | SM. Tucumán       | -26.8321377-65.2140929  | Manhole                                                        |
| SP05 | SM. Tucumán       | -26.8404344-65.2007152  | Manhole                                                        |
| SP06 | SM. Tucumán       | -26.828233-65.1961796   | Manhole                                                        |
| SP10 | SM. Tucumán       | -26.8082848-65.2175903  | Manhole                                                        |
| SP11 | Yerba Buena       | -26.8155347-65.3011424  | Manhole                                                        |
| SP12 | Yerba Buena       | -26.8138829-65.2905533  | Manhole                                                        |
| SP13 | Yerba Buena       | -26.8139626-65.2735795  | Manhole                                                        |
| SP14 | Yerba Buena       | -26.8024385-65.2704578  | Manhole                                                        |
| SP15 | SM. Tucumán       | -26.8132221-65.2005151  | Manhole                                                        |
| SP16 | SM. Tucumán       | -26.8208967-65.2053334  | Manhole                                                        |
| SP07 | SM. Tucumán       | -26.87476172-65.2122031 | San Felipe sewage treatment plant entrance                     |
| SP08 | SM. Tucumán       | -26.82204-65.1955586    | Health Center Zenon J. Santillan wastewater inspection chamber |
| SP09 | Banda del R. Salí | -26.8382557-65.1768163  | Eva Peron Hospital wastewater inspection chamber               |

750

751

752

753

754

755

756

757

758

759

760

761

762

763

764

765

766

767

768

769

770

771

772

773

774 Table 2

| Load viral (copies/mL) |                      |                     |              |                   |        |
|------------------------|----------------------|---------------------|--------------|-------------------|--------|
| ID                     | Apr-21               | Jun-21              | Sep-21       | Dic-21            | Mar-22 |
| SP1                    | ND                   | ND                  | ND           | ND                | ND     |
| SP2                    | ND                   | ND                  | ND           | ND                | ND     |
| SP3                    | ND                   | ND                  | 0,64 ± 0,42  | ND                | ND     |
| SP4                    | 250142.49 ± 66554.29 | 3229.37 ± 974.32    | 5.60 ± 1.34  | 10.48 ± 2.79      | ND     |
| SP5                    | ND                   | ND                  | ND           | 3096.75 ± 201.14  | ND     |
| SP6                    | ND                   | ND                  | 5.12 ± 4.11  | 64.26 ± 17.67     | ND     |
| SP7                    | 1451.06 ± 486.40     | 5334.32 ± 1703.69   | 12.54 ± 5.46 | 1.13 ± 0.51       | ND     |
| SP8                    | 5222.14 ± 777.78     | 32725.17 ± 13010.01 | 28.86 ± 3.34 | 12260.28 ± 966.64 | ND     |
| SP9                    | 333.06 ± 0.77        | 6041.19 ± 2141.08   | ...          | 1.78 ± 0.57       | ND     |
| SP10                   | 1066.21 ± 375.09     | 2708.26 ± 720.57    | ...          | 28.79 ± 3.73      | ND     |
| SP11                   | ND                   | ND                  | ...          | 2.50 ± 1.14       | ND     |
| SP12                   | ND                   | 441.00 ± 95.47      | ...          | ND                | ND     |
| SP13                   | 1966.81 ± 722.67     | 2228.73 ± 999.08    | ...          | 4.99 ± 5.14       | ND     |
| SP14                   | ND                   | 196.11 ± 43.35      | ...          | ND                | ND     |
| SP15                   | ND                   | 1178.28 ± 376.32    | ...          | ND                | ND     |
| SP16                   | ND                   | ND                  | ...          | 1.17 ± 0.85       | ND     |

775

776

777

778

779

780

781

782

783

784

785

786

787

788

789



790 Figure 1

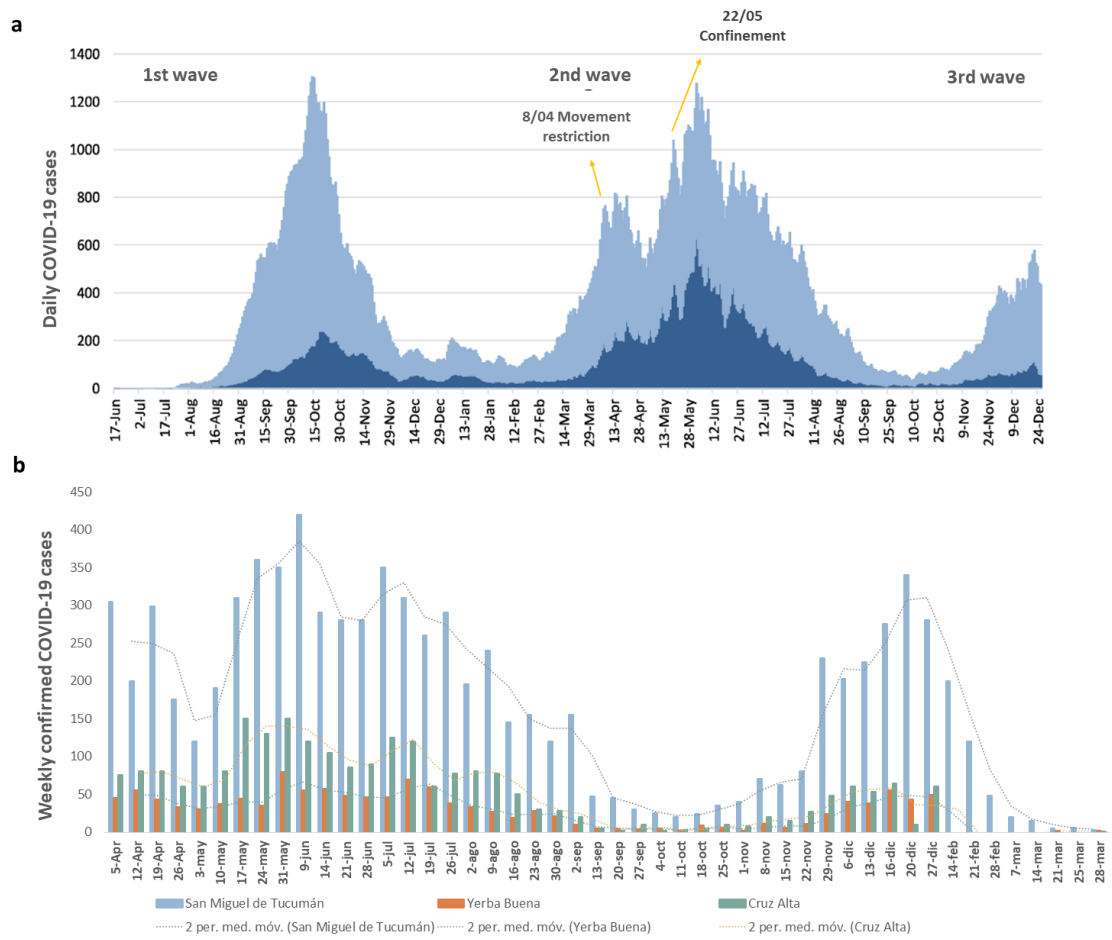

791  
792  
793  
794  
795  
796  
797  
798  
799  
800  
801  
802  
803  
804  
805  
806  
807

808 Figure 2

809

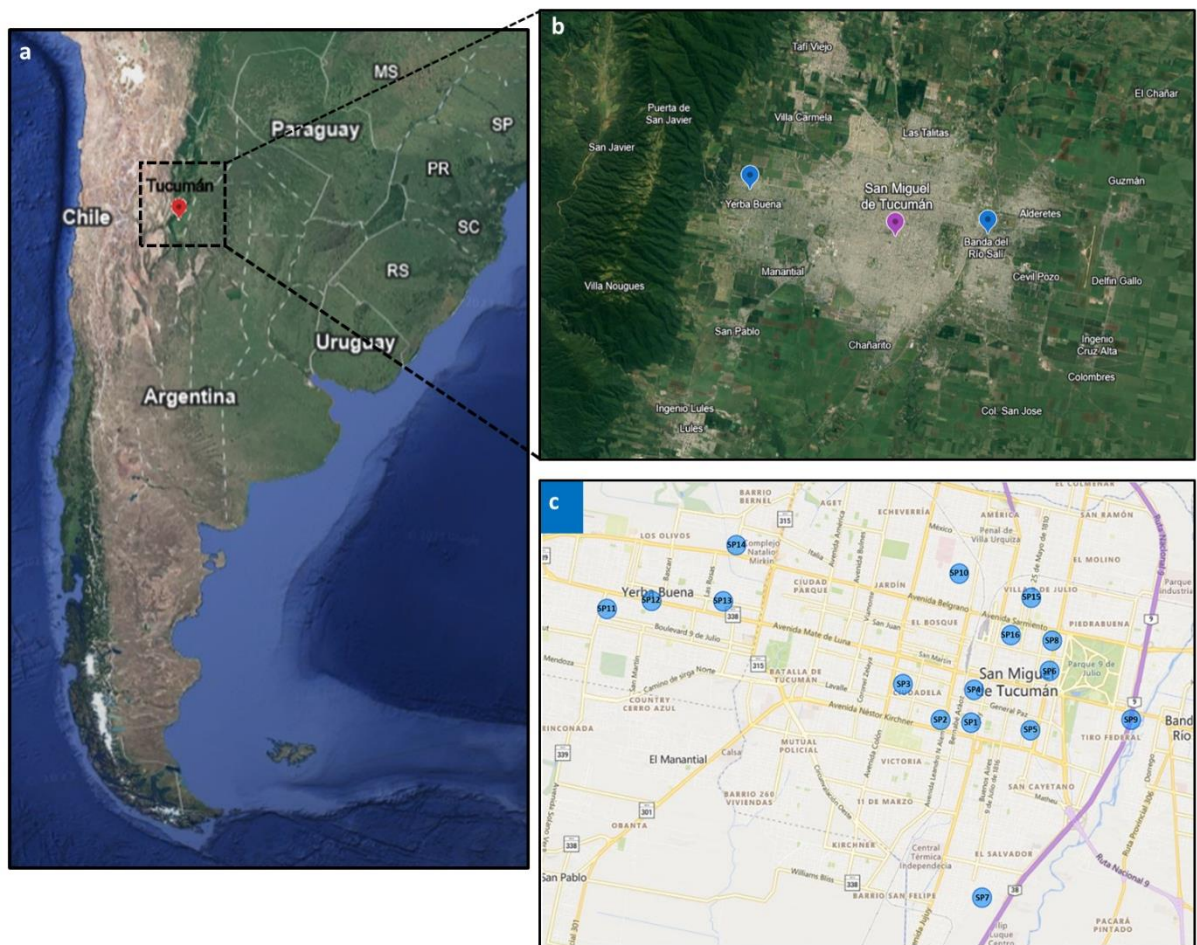

810

811

812

813

814

815

816

817

818

819

820

821

822

823

824

825 Figure 3

826

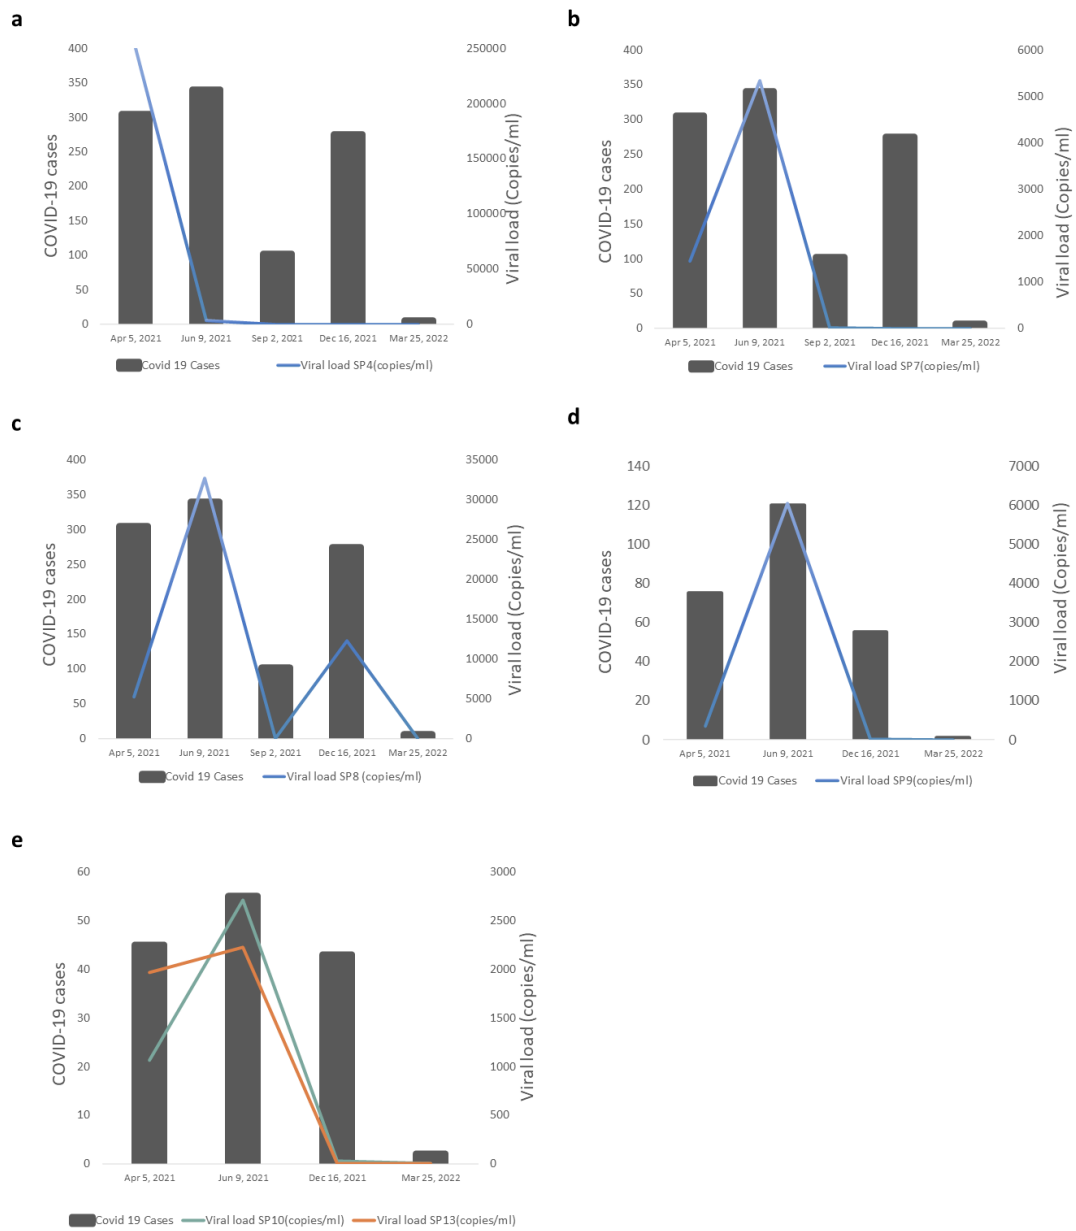

827
